# Supplementary material
Source: publisher figshare collection journal article supplement (https://sage.figshare.com/ndownloader/files/33147484)
Supplement: Supplementary file 1 [file 33147484]

Supplemental Table: Personal characteristics of US veterans and non-veterans

| <b>Descriptive</b>                                   | <b>Total sample<br/>(N=151765)<br/>n (%)</b> | <b>Non-Veterans<br/>(n=138251)<br/>n (%)</b> | <b>Veterans<br/>(n=13514)<br/>n (%)</b> | <b>P-<br/>Value</b> |
|------------------------------------------------------|----------------------------------------------|----------------------------------------------|-----------------------------------------|---------------------|
| <b>Obesity</b>                                       |                                              |                                              |                                         |                     |
| Yes                                                  | 45924 (29.68%)                               | 41684 (29.55%)                               | 4240 (31.11%)                           | 0.0012              |
| No                                                   | 105841 (70.32%)                              | 96597 (70.45%)                               | 9274 (68.89%)                           |                     |
| <b>Year</b>                                          |                                              |                                              |                                         |                     |
| 2013                                                 | 31830 (19.94%)                               | 30822 (21.20%)                               | 1008 (7.60%)                            | <0.0001             |
| 2014                                                 | 33821 (19.68%)                               | 30380 (19.37%)                               | 3441 (23.01%)                           |                     |
| 2015                                                 | 31165 (19.75%)                               | 28010 (19.43%)                               | 3155 (23.12%)                           |                     |
| 2016                                                 | 30297 (20.20%)                               | 26949 (19.90%)                               | 3348 (23.47%)                           |                     |
| 2017                                                 | 24652 (20.42%)                               | 22090 (20.20%)                               | 2562 (22.80%)                           |                     |
| <b>Age</b>                                           |                                              |                                              |                                         |                     |
| < 40                                                 | 48411 (33.19%)                               | 46946 (35.23%)                               | 1465 (11.67%)                           | <0.0001             |
| 40-59                                                | 51142 (33.44%)                               | 47665 (34.11%)                               | 3477 (26.37%)                           |                     |
| 60+                                                  | 52212 (33.37%)                               | 43640 (30.67%)                               | 8572 (61.96%)                           |                     |
| <b>Sex</b>                                           |                                              |                                              |                                         |                     |
| Male                                                 | 69776 (46.96%)                               | 57422 (42.75%)                               | 12354 (91.62%)                          | <0.0001             |
| Female                                               | 81989 (53.04%)                               | 80829 (57.25%)                               | 1160 (8.38%)                            |                     |
| <b>Race</b>                                          |                                              |                                              |                                         |                     |
| White                                                | 100519 (69.30%)                              | 89666 (68.20%)                               | 10853 (80.94%)                          | <0.0001             |
| Hispanic                                             | 22583 (13.05%)                               | 21818 (13.75%)                               | 765 (5.60%)                             |                     |
| Black                                                | 20023 (12.57%)                               | 18405 (12.63%)                               | 1618 (11.93%)                           |                     |
| Asian                                                | 8640 (5.08%)                                 | 8362 (5.42%)                                 | 278 (1.53%)                             |                     |
| <b>Marital Status</b>                                |                                              |                                              |                                         |                     |
| Married                                              | 67868 (44.74%)                               | 60726 (43.98%)                               | 7142 (52.74%)                           | <.0001              |
| Living with partner                                  | 9114 (6.01%)                                 | 8597 (6.20%)                                 | 517 (4.03%)                             |                     |
| Single                                               | 74498 (49.25%)                               | 68664 (49.82%)                               | 5834 (43.22%)                           |                     |
| <b>Degree</b>                                        |                                              |                                              |                                         |                     |
| No high school degree                                | 20217 (12.01%)                               | 19206 (12.48%)                               | 1011 (7.04%)                            | <0.0001             |
| High school degree                                   | 37714 (24.31%)                               | 34148 (24.16%)                               | 3566 (25.92%)                           |                     |
| Some college/ associates/<br>degrees/ college degree | 93317 (63.68%)                               | 84399 (63.36%)                               | 8918 (67.04%)                           |                     |
| <b>Federal Poverty Level Poverty</b>                 |                                              |                                              |                                         |                     |
| Less than 100% - 1                                   | 21875 (13.45%)                               | 20997 (14.11%)                               | 878 (6.43%)                             | <0.0001             |
| 100% and less than 200%                              | 28153 (17.52%)                               | 26060 (17.76%)                               | 2093 (14.90%)                           |                     |
| 200% and less than 400%                              | 40711 (26.64%)                               | 36485 (26.28%)                               | 4226 (30.89%)                           |                     |
| >400%                                                | 50443 (35.33%)                               | 45102 (34.82%)                               | 5341 (40.82%)                           |                     |
| Missing                                              | 10583 (7.06%)                                | 9607 (7.03%)                                 | 976 (7.36%)                             |                     |
| <b>Health Insurance Type</b>                         |                                              |                                              |                                         |                     |
| Not covered                                          | 19281 (11.87%)                               | 18736 (12.61%)                               | 545 (4.06%)                             | <0.0001             |
| Private                                              | 73734 (50.92%)                               | 70571 (53.42%)                               | 3163 (24.45%)                           |                     |
| Medicare/ Medicaid                                   | 27771 (18.03%)                               | 25454 (18.07%)                               | 2317 (17.61%)                           |                     |
| Military                                             | 3175 (2.11%)                                 | 1471 (1.10%)                                 | 1704 (12.83%)                           |                     |
| Military plus                                        | 3972 (2.38%)                                 | 1491 (1.01%)                                 | 2481 (16.91%)                           |                     |
| Multiple non-military                                | 23340 (14.70%)                               | 20051 (13.80%)                               | 3289 (24.14%)                           |                     |
| <b>Self-Reported Health Status</b>                   |                                              |                                              |                                         |                     |
| Excellent/very good                                  | 87639 (59.01%)                               | 80961 (59.86%)                               | 6678 (50.01%)                           | <0.0001             |
| Good                                                 | 41577 (26.87%)                               | 37241 (26.41%)                               | 4336 (31.72%)                           |                     |
| Fair/Poor                                            | 22493 (14.12%)                               | 19998 (13.73%)                               | 2495 (18.27%)                           |                     |
| <b>Usual Care</b>                                    |                                              |                                              |                                         |                     |
| Yes                                                  | 131369 (86.84%)                              | 118905 (86.34%)                              | 12464 (86.34%)                          | <.0001              |
| No                                                   | 20231 (13.16%)                               | 19192 (13.66%)                               | 1039 (7.82%)                            |                     |

Note: Values are unweighted sample sizes, and all percentages were weighted; Chi-square represents association between each characteristic and veteran status.
